# Supplementary material for: The Proportion of Regulatory T Cells in Patients with Ankylosing Spondylitis: A Meta-Analysis
Source: PubMed Central journal article supplement (PMC6854227; doi:10.1155/2019/1058738), 2019-10-23

## **Supplementary Materials**

**Supplementary Table 1:** Background of AS patients in each study.

**Supplementary Figure 1:** Forest plot of the overall meta-analysis of regulatory T cell (Treg) proportions in peripheral blood (PB), identified as single CD25-positive, between ankylosing spondylitis (AS) patients and healthy blood donors (HD).

**Supplementary Figure 2:** Forest plot of the overall meta-analysis of regulatory T cell (Treg) proportions in peripheral blood (PB), identified with FOXP3-positive, between ankylosing spondylitis (AS) patients and healthy blood donors (HD).

**Supplementary Figure 3:** Forest plot of the overall meta-analysis of regulatory T cell (Treg) proportions in peripheral blood (PB), identified with CD127-negative, between ankylosing spondylitis (AS) patients and healthy blood donors (HD).

Supplementary Table 1: Background of AS patients in each study.

| Author (ref.)               | Age, year  | Female,<br>% | Disease<br>duration, year | ESR, mm/h  | CRP, mg/l | BASDAI    | Medication                                    |
|-----------------------------|------------|--------------|---------------------------|------------|-----------|-----------|-----------------------------------------------|
| Duojia Cao et al.[14]       | 36.6±12.4  | 60           | NA                        | NA         | NA        | NA        | NA                                            |
| Jau-Ling Suen et al.[17]    | 43±12      | 17.4         | NA                        | NA         | NA        | NA        | NA                                            |
| Éric Toussirot et al.[32]   | 42.9±1.1   | 26.7         | 9.2±0.6                   | 28.2±2.1   | 25.1±3.2  | 35.9±2.2  | NA                                            |
| Frauke Forger et al.[29]    | 32.47±5.12 | 100          | 8.13±5.19                 | NA         | 77.1±50.4 | 3.03±2.14 | NSAIDS<br>GC<br>Sulfasalazine<br>Cyclosporine |
| Francesco Ciccia et al.[22] | 19-48      | 38.9         | 0.33±0.17                 | NA         | NA        | 6.8±2.5   | NSAIDS                                        |
| Christian Dejaco et al.[23] | 40.9±12.7  | 59.1         | NA                        | 23.1±23.6  | 11±20.4   | NA        | NA                                            |
| Heiner Appel et al.[33]     | 40.9±13.8  | NA           | 11.3±9.1                  | 32.7±21.7  | 20±39     | 3.44±2.16 | NSAIDS<br>MTX<br>TNF-α blocker                |
| Ming-Han Chen et al.[30]    | 36.7±3     | 21.7         | 8.04±1.8                  | 24.57±4.39 | 18.4±4.1  | NA        | TNF-α blocker                                 |
| Yanfeng Wu et al.[5]        | 30.2±8.3   | 15.7         | NA                        | NA         | NA        | ≥4        | NA                                            |
| S-S Zhao et al.[6]          | 26.4±6.1   | 7.1          | 1.6±0.4                   | 15.2±5.4   | 63±28     | 5.1±1.1   | no drug                                       |
| Katayoon Bidad et al.[46]   | 34±2       | 27.8         | 10±1                      | NA         | NA        | 3.73±2.23 | NSAIDS<br>DMARDS                              |

|                                   |           |      |              |             |            |             |                                                       |
|-----------------------------------|-----------|------|--------------|-------------|------------|-------------|-------------------------------------------------------|
| Leonardo Limon–Camacho et al.[11] | 32±13     | 18   | NA           | NA          | 14±3.2     | 4.4±2.4     | NA                                                    |
| Yong Gao et al.[34]               | 29.1±8.6  | 35   | 4.3±1.9      | NA          | NA         | NA          | NA                                                    |
| Li Xueyi et al.[7]                | 33.6±8    | 31.1 | NA           | 41±15.3     | 8.7±3.9    | 6.8±2.6     | NSAIDS<br>DMARDS<br>TNF- $\alpha$ blocker             |
| Lingying Ye et al.[62]            | NA        | NA   | NA           | NA          | NA         | NA          | NA                                                    |
| Wei Ji et al.[39]                 | NA        | NA   | NA           | 31.18±15.63 | 16.3±11.28 | 51.94±11.57 | NSAIDS<br>DMARDS                                      |
| Zhang Xin et al.[8]               | NA        | NA   | NA           | NA          | NA         | NA          | NA                                                    |
| Hsien–Tzung Liao et al.[31]       | 39.6±12.7 | 17.3 | 13.3±10.9    | 27.7±26     | 22±1.67    | 4.08±1.89   | NA                                                    |
| Yuxing Shan et al.[24]            | 24.8±7.2  | 20   | NA           | 57.3±23.2   | 40.2±26.5  | 5.2±0.7     | NA                                                    |
| Chenggong Wang et al.[35]         | 51.8±7.5  | 48.9 | 3.04±2.5     | NA          | NA         | NA          | NA                                                    |
| Elliott TJ Dunn et al.[36]        | 51.3±15.7 | 0    | 7.8±6.8,2-21 | NA          | 10±6.9     | 4.9±2       | NSAIDS<br>MTX<br>Leflunomide<br>TNF- $\alpha$ blocker |
| Huifang Guo et al.[9]             | 28.2±1.04 | 19.7 | NA           | NA          | NA         | NA          | NA                                                    |
| Zhongliang Duan et al.[40]        | 37±9.8    | 33.3 | NA           | NA          | NA         | >4          | NA                                                    |
| Zofia Gula et al.[37]             | 33.9±6.8  |      | 6.67±3.01    | 24.78±6.7   | 7.95±3.22  | 2.93±1.14   | NA                                                    |
| Dan Xu et al.[25]                 | NA        | NA   | NA           | NA          | NA         | >4          | NSAIDS<br>DMARDS                                      |

|                                 |             |      |           |             |             |           |                                       |
|---------------------------------|-------------|------|-----------|-------------|-------------|-----------|---------------------------------------|
| Mingfei Wang et al.[10]         | 33.5±8.4    | 25   | NA        | 39.8±14     | 26.3±12.7   | 5.9±1.5   | Biological agents<br>NA               |
| Mohammad Javad Fattahietal.[38] | 31.4±9.1    | 26.7 | 11.8±8.6  | NA          | NA          | ≥4        | GC<br>NSAIDS<br>MTX                   |
| Renfang Han et al.[21]          | 32.53±9.76  | 22.5 | 3.0±2.11  | 18.0±8.99   | 6.63±0.63   | 1.97±1.31 | NSAIDS<br>DMARDS<br>Biological agents |
| Sonja Dulic et al.[41]          | 45.22±10.04 | NA   | 1.72±0.87 | 23.64±18.84 | 23.45±26.06 | 1.19±4.62 | TNF-α blocker                         |

---

AS = Ankylosing spondylitis ; CRP = C-reactive protein; ESR = erythrocyte sedimentation rate; BASDAI = Bath Ankylosing Spondylitis Disease Activity Index; NSAIDS = Non-Steroidal Antiinflammatory Drugs; DMARDS = disease modified anti-rheumatic-drugs; MTX = methotrexate; NA = not applicable; GS = Glucocorticoids

## Supplementary Figure 1

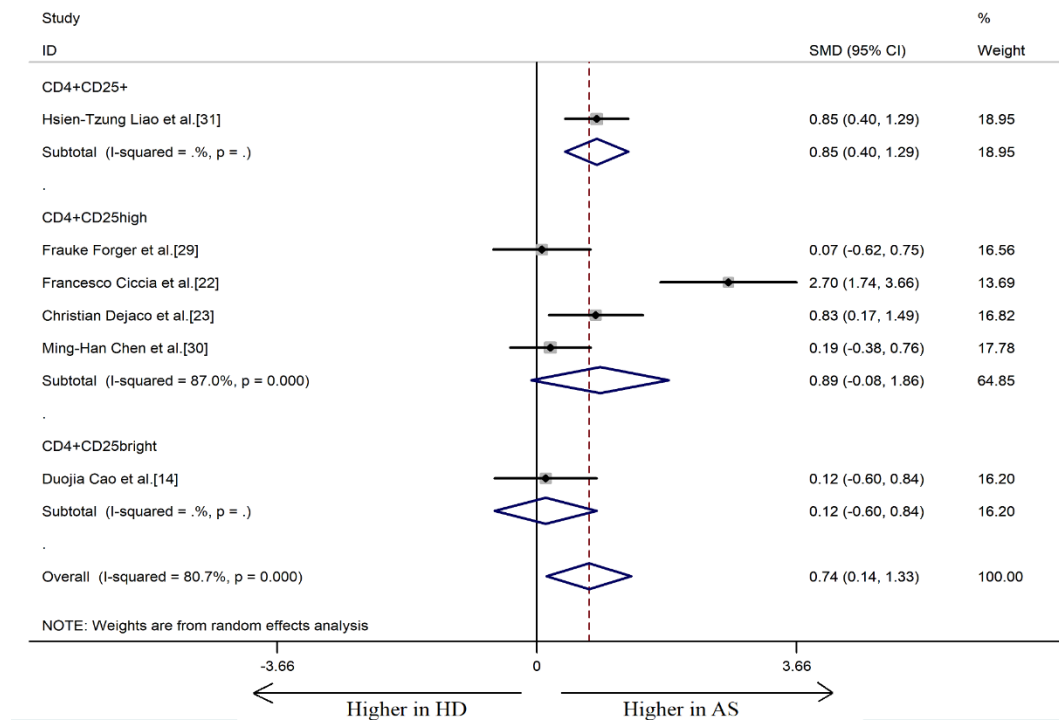

## Supplementary Figure 2

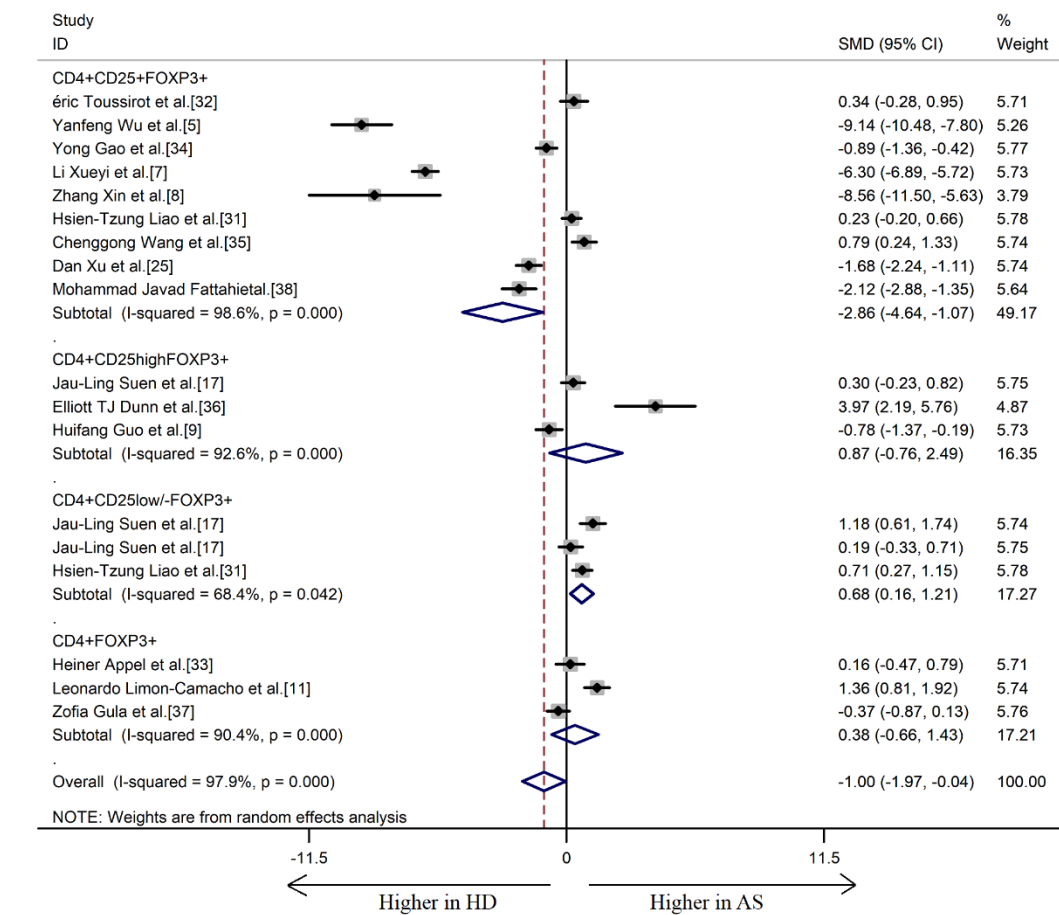

### Supplementary Figure 3

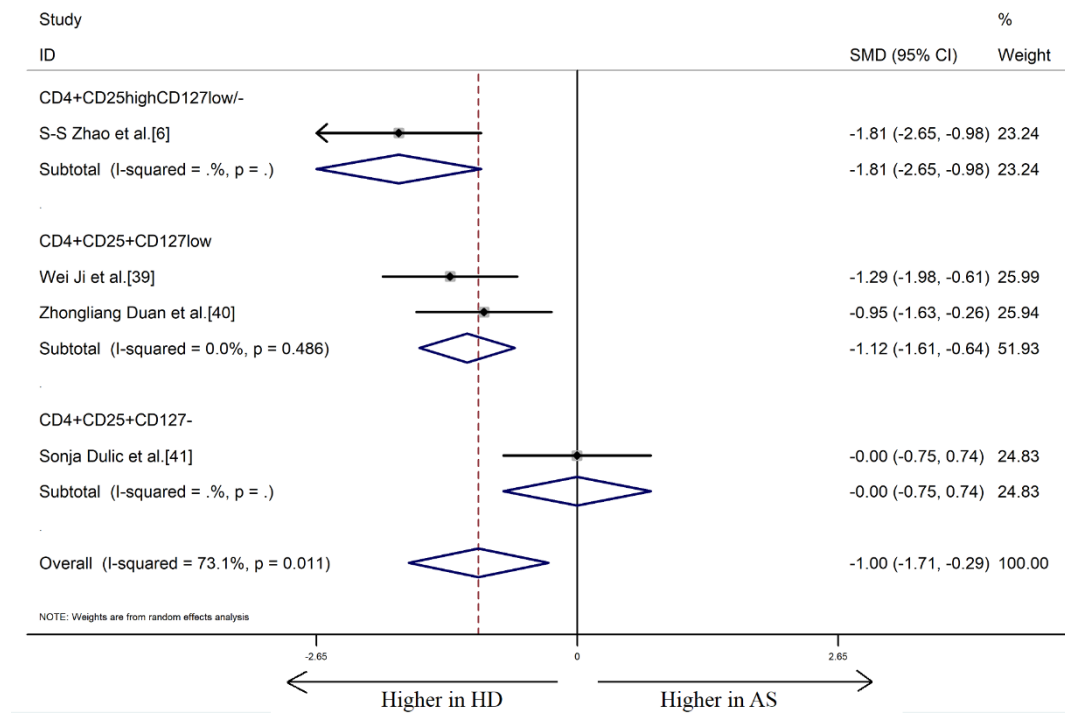

Supplement: 1058738.f1.pdf [file 1058738.f1.pdf]
